# Supplementary material for: Unusual three-dimensional coordination networks with [WS4Cu6] cluster nodes and α-C3N4topology
Source: Royal Society of Chemistry journal article supplement (doi:10.1039/b818381c), 2008-12-06
Supplement: b818381c.pdf [file b818381c.pdf]

## Supporting Information for

### Unusual three-dimensional coordination networks with [WS<sub>4</sub>Cu<sub>6</sub>] clusters nodes and $\alpha$ -C<sub>3</sub>N<sub>4</sub> topology

Zhao-Rui Pan, Xiao-Qiang Yao, He-Gen Zheng,\* Yi-Zhi Li,\* Zi-Jian Guo and Stuart R. Batten\*

Table S1 Selected Bond Distances (Å) and Angles (deg) for compounds 1 and 2

|                   |            |                 |            |
|-------------------|------------|-----------------|------------|
| <b>Compound 1</b> |            |                 |            |
| Br1 – Cu1         | 2.4443(10) | Cu1 – N1        | 2.039(6)   |
| Cu1 – S1          | 2.3237(16) | Cu1 – S1a       | 2.3389(18) |
| Cu1 – W1          | 2.7441(7)  | Cu2 – N3        | 1.988(5)   |
| Cu2 – S1          | 2.2794(16) | Cu2 – W1        | 2.6627(10) |
| S1 – W1           | 2.2132(14) |                 |            |
|                   |            |                 |            |
| N1 – Cu1 – S1a    | 121.71(16) | N1 – Cu1 – S1   | 110.74(18) |
| S1a – Cu1 – S1    | 101.57(7)  | N1 – Cu1 – Br1  | 99.16(17)  |
| S1a – Cu1 – Br1   | 112.69(5)  | S1 – Cu1 – Br1  | 111.21(5)  |
| N1 – Cu1 – W1     | 129.87(17) | S1a – Cu1 – W1  | 50.86(4)   |
| S1 – Cu1 – W1     | 50.97(4)   | Br1 – Cu1 – W1  | 130.50(3)  |
| N3 – Cu2 – N3b    | 93.7(3)    | N3 – Cu2 – S1b  | 110.01(16) |
| N3 – Cu2 – S1     | 119.35(14) | S1b – Cu2 – S1  | 105.03(8)  |
| N3 – Cu2 – W1     | 133.15(15) | S1 – Cu2 – W1   | 52.51(4)   |
| W1 – S1 – Cu2     | 72.68(5)   | W1 – S1 – Cu1c  | 74.39(5)   |
| Cu2 – S1 – Cu1c   | 117.39(7)  | W1 – S1 – Cu1   | 74.09(5)   |
| Cu2 – S1 – Cu1    | 106.93(6)  | Cu1c – S1 – Cu1 | 112.96(6)  |
| S1a – W1 – S1     | 109.40(4)  | S1 – W1 – S1b   | 109.62(8)  |
| S1a – W1 – Cu2    | 125.19(4)  | S1 – W1 – Cu2   | 54.81(4)   |
| Cu2c – W1 – Cu2   | 180.0      | S1a – W1 – Cu1  | 54.64(4)   |

|                   |            |                  |            |
|-------------------|------------|------------------|------------|
| S1– W1– Cu1       | 55.05(4)   | S1b – W1– Cu1    | 120.39(5)  |
| Cu2 – W1 – Cu1    | 86.670(17) | Cu1 – W1 – Cu1b  | 173.34(4)  |
| S1 – W1– Cu1a     | 130.21(4)  | Cu2 – W1 – Cu1a  | 93.330(18) |
| Cu1– W1– Cu1a     | 90.193(2)  |                  |            |
| <b>Compound 2</b> |            |                  |            |
| Br1– Cu1          | 2.4221(15) | Cu1– N1          | 2.010(9)   |
| Cu1 – S1          | 2.302(3)   | Cu1– W1          | 2.7163(11) |
| Cu2 – N4          | 2.071(8)   | Cu2– S1a         | 2.325(2)   |
| Cu2 – W1          | 2.6699(16) | S1– W1           | 2.265(2)   |
| S1a– Cu1          | 2.332(3)   |                  |            |
|                   |            |                  |            |
| N1 – Cu1 – S1     | 119.3(3)   | N1– Cu1– S1b     | 103.9(3)   |
| S1– Cu1– S1       | 105.24(11) | N1– Cu1– Br1     | 103.7(3)   |
| S1– Cu1– Br1      | 114.02(8)  | S1b– Cu1– Br1    | 110.22(7)  |
| N1– Cu1– W1       | 122.2(3)   | S1– Cu1 – W1     | 52.89(6)   |
| S1b– Cu1– W1      | 52.65(6)   | Br1– Cu1 – W1    | 133.06(5)  |
| N4c– Cu2– N4      | 99.0(4)    | N4– Cu2– S1a     | 112.2(2)   |
| N4– Cu2 – S1b     | 113.3(2)   | S1 a–Cu2 –S1b    | 106.80(12) |
| N4 – Cu2 – W1     | 130.5(2)   | S1a– Cu2 – W1    | 53.40(6)   |
| W1– S1– Cu1       | 72.99(7)   | W1– S1 – Cu2b    | 71.13(7)   |
| Cu1– S1– Cu2b     | 115.77(10) | W1– S1 – Cu1a    | 72.41(7)   |
| Cu1 – S1–Cu1a     | 112.28(9)  | Cu2b – S1 – Cu1a | 105.05(9)  |
| S1 – W1 – S1c     | 110.95(11) | S1– W1– S1a      | 108.74(5)  |
| S1 – W1 – Cu2     | 124.52(5)  | S1a– W1 – Cu2    | 55.48(5)   |
| Cu2 –W1 –Cu2b     | 180.0      | S1 – W1 – Cu1a   | 54.94(6)   |
| S1b – W1– Cu1a    | 130.71(6)  | Cu2 – W1– Cu1a   | 93.35(3)   |
| S1– W1– Cu1       | 54.12(6)   | S1c– W1 – Cu1    | 130.71(6)  |
| S1a – W1 – Cu1    | 120.55(6)  | Cu2 – W1 – Cu1   | 86.65(3)   |
| Cu1a – W1 – Cu1   | 90.195(3)  | Cu1– W1– Cu1c    | 173.30(5)  |

Symmetry transformations used to generate equivalent atoms:

$$a = -x + 1/4, -z + 7/4, y - 1/4; b = x, -y + 2, -z + 3/2; c = -x + 1/4, z + 1/4, -y + 7/4.$$

(compound 1).

$$a = -x + 1/4, -z + 7/4, y - 1/4; b = -x + 1/4, z + 1/4, -y + 7/4; c = x, -y + 2, -z + 3/2.$$

(compound 2).

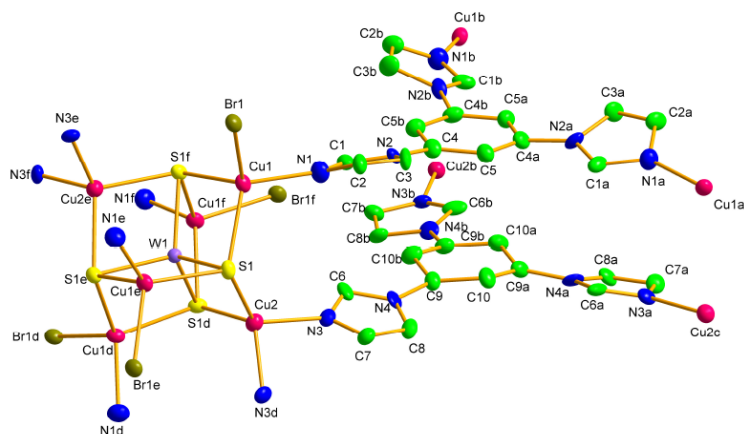

**Fig. S1** Structural unit of  $[(WS_4Cu_6Br_4)(timp)_{8/3}(H_2O)_{40/3}]_n$  (**1**) with atom numbering, showing 30% thermal ellipsoids. Hydrogen atoms and water molecules have been omitted for clarity. Symmetry Code:  $a = 0.5 - z, 1 - x, -0.5 + y$ ;  $b = 1 - y, 0.5 + z, 0.5 - x$ ;  $c = -1 + z, 1 - x, 1.5 - y$ ;  $d = x, 2 - y, 1.5 - z$ ;  $e = 0.25 - x, 0.25 + z, 1.75 - y$ ;  $f = 0.25 - x, 1.75 - z, -0.25 + y$ .

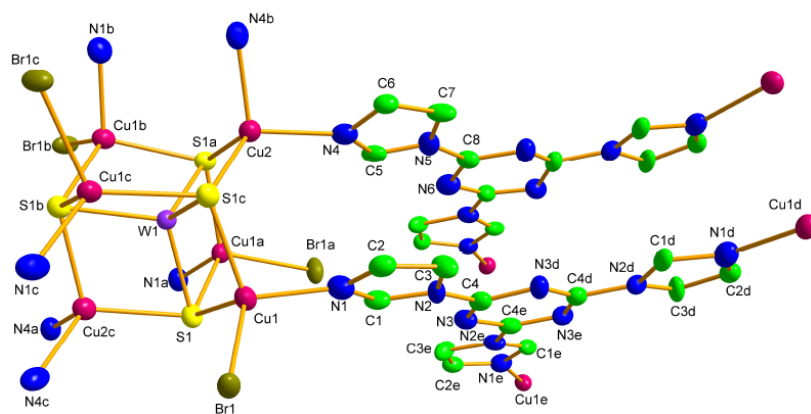

**Fig. S2** Structural unit of  $[(WS_4Cu_6Br_4)(timt)_{8/3}(H_2O)_{40/3}]_n$  (**2**) with atom numbering, showing 30% thermal ellipsoids. Hydrogen atoms and water molecules have been omitted for clarity. Symmetry Code:  $a = 0.25 - x, 1.75 - z, -0.25 + y$ ;  $b = x, 2 - y, 1.5 - z$ ;  $c = 0.25 - x, 0.25 + z, 1.75 - y$ ;  $d = -0.5 + y, 1.5 - z, 1 - x$ ;  $e = 1 - z, 0.5 + x, 1.5 - y$ .

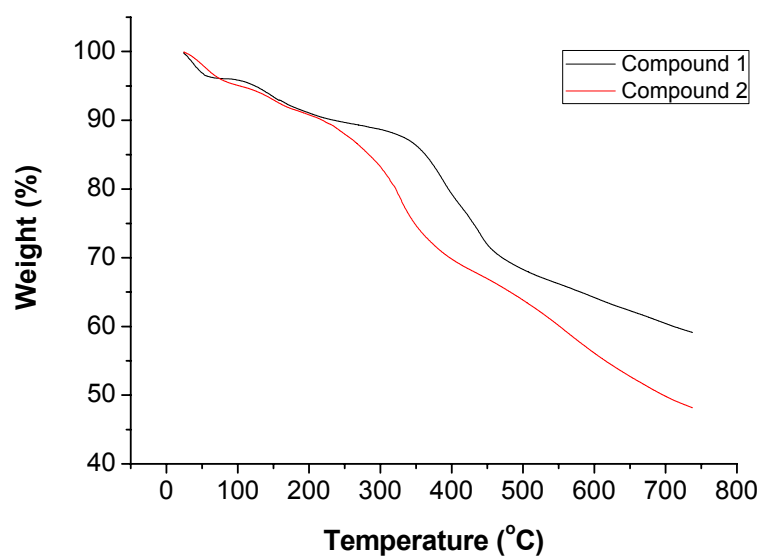

**Fig. S3** TG plot of compounds **1** and **2**.

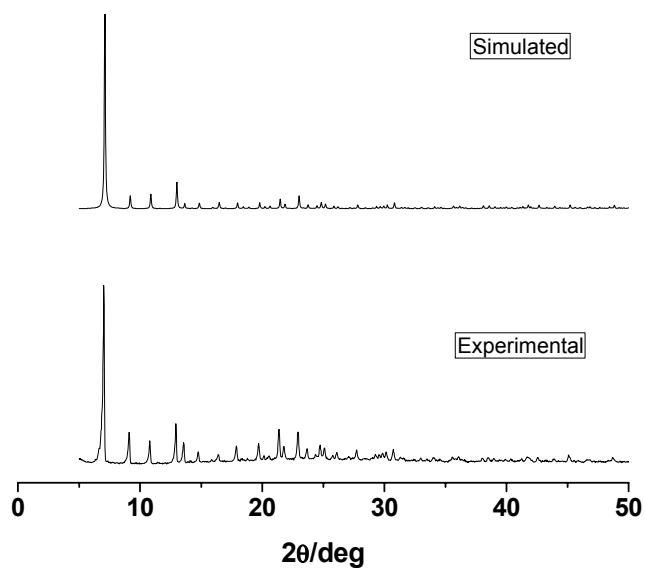

**Fig. S4** Simulated and experimental PXRD pattern of compound **1**.

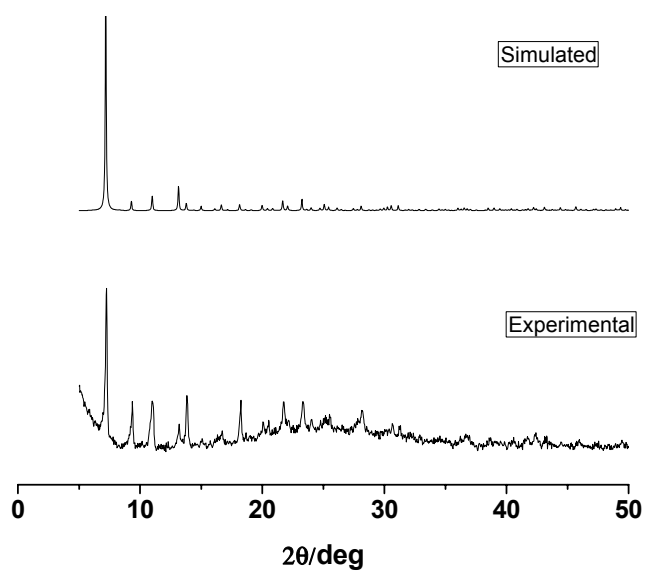

**Fig. S5** Simulated and experimental PXRD pattern of compound 2.

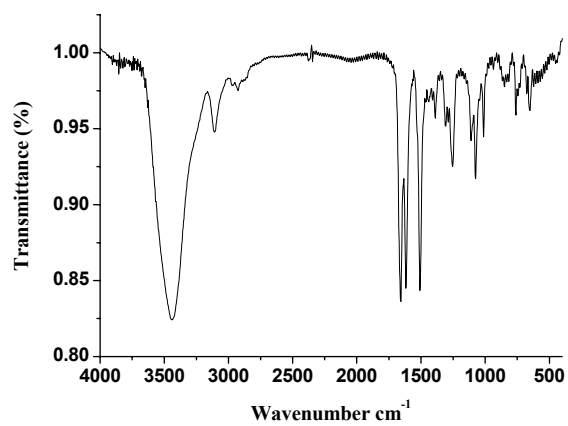

**Fig. S6** IR spectrum of compound 1.

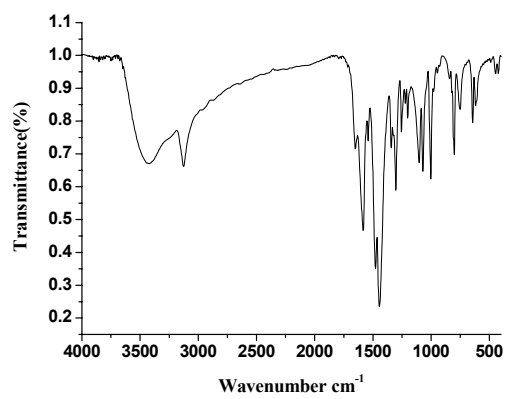

**Fig. S7** IR spectrum of compound 2.

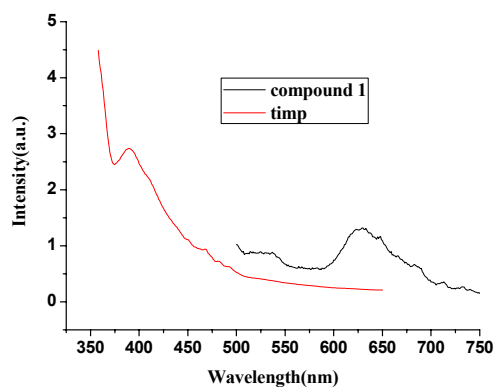

**Fig. S8** Solid-state photoluminescent spectra of compound **1** and timp ligand at room temperature.

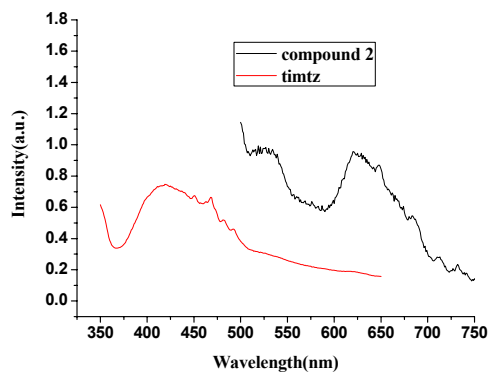

**Fig. S9** Solid-state photoluminescent spectra of compound **2** and timtz ligand at room temperature.
